# Supplementary material for: Beta-binomial modeling of CRISPR pooled screen data identifies target genes with greater sensitivity and fewer false negatives
Source: HighWire-hosted journal article supplement (doi:10.1101/gr.245571.118), 2019-04-23
Supplement: Supplemental_Figure_S2.pdf [file Supplemental_Figure_S2.pdf]

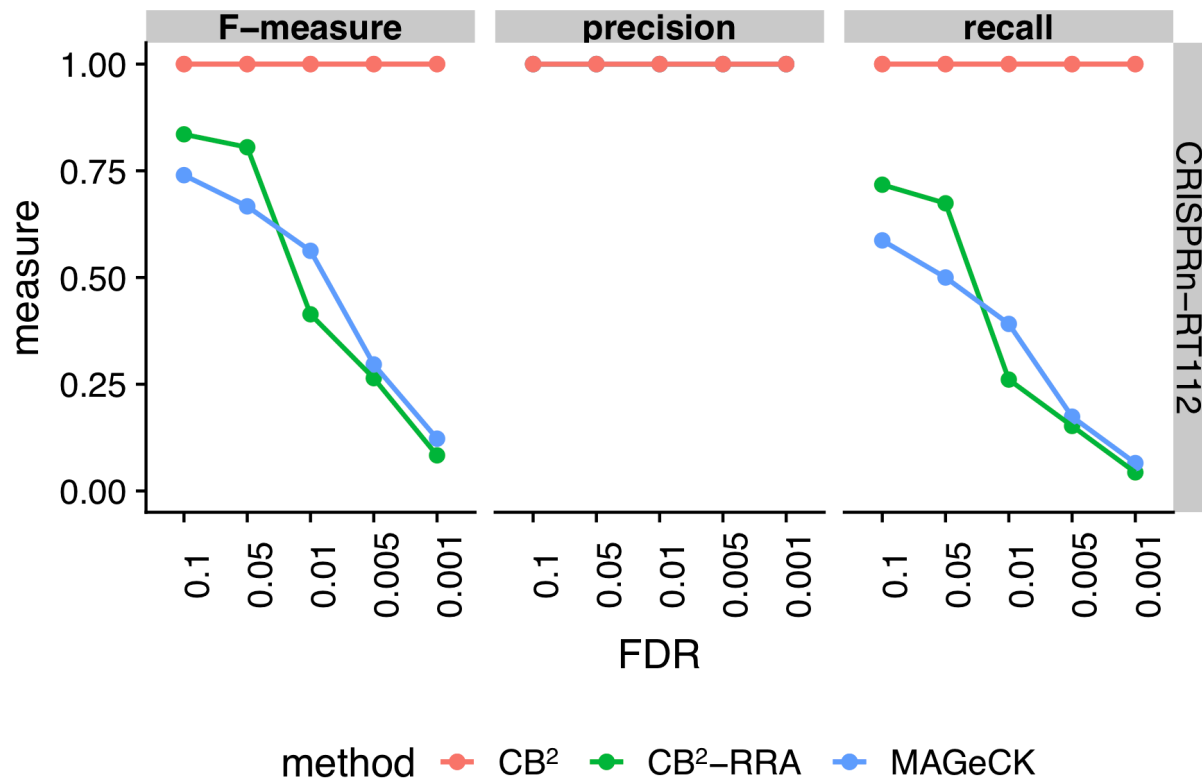

Supplemental Figure 2. F1-score, precision, and recall measurements at different FDR cut-offs across CB<sup>2</sup>-Fisher, CB<sup>2</sup>-RRA, and MAGeCK (RRA). At commonly used FDR cut-offs, CB<sup>2</sup> can identify most of the essential genes with high rates of recall.
