# Supplementary material for: Beta-binomial modeling of CRISPR pooled screen data identifies target genes with greater sensitivity and fewer false negatives
Source: HighWire-hosted journal article supplement (doi:10.1101/gr.245571.118), 2019-04-23
Supplement: Supplemental_Figure_S3.pdf [file Supplemental_Figure_S3.pdf]

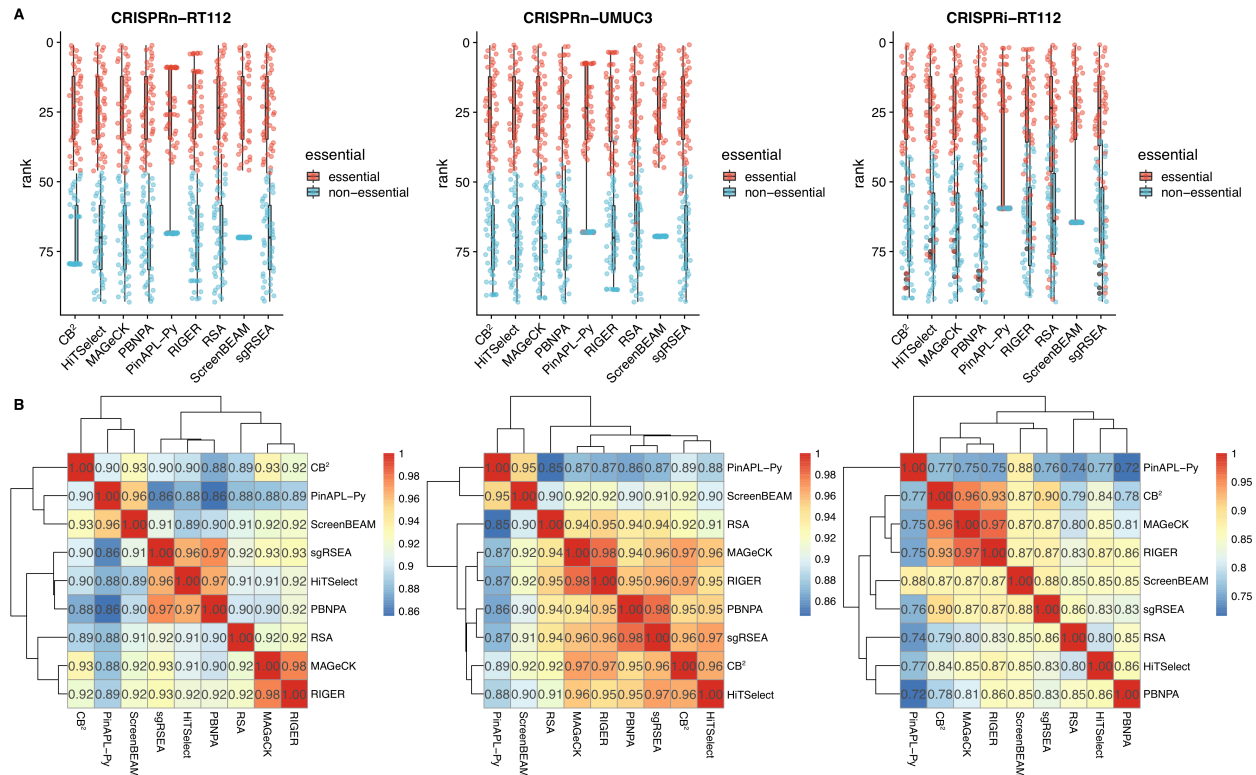

Supplemental Figure 3. Rank Comparison of different methods using three benchmark datasets. (A) boxplots indicate distinction between essential genes and non-essential genes by ranks for each dataset. (B) heatmaps indicate correlations of gene-rankings between analysis methods for each dataset.
