# Supplementary material for: Beta-binomial modeling of CRISPR pooled screen data identifies target genes with greater sensitivity and fewer false negatives
Source: HighWire-hosted journal article supplement (doi:10.1101/gr.245571.118), 2019-04-23
Supplement: Supplemental_Figure_S4.pdf [file Supplemental_Figure_S4.pdf]

Screen from Evers et al. (CRISPRn-RT112)

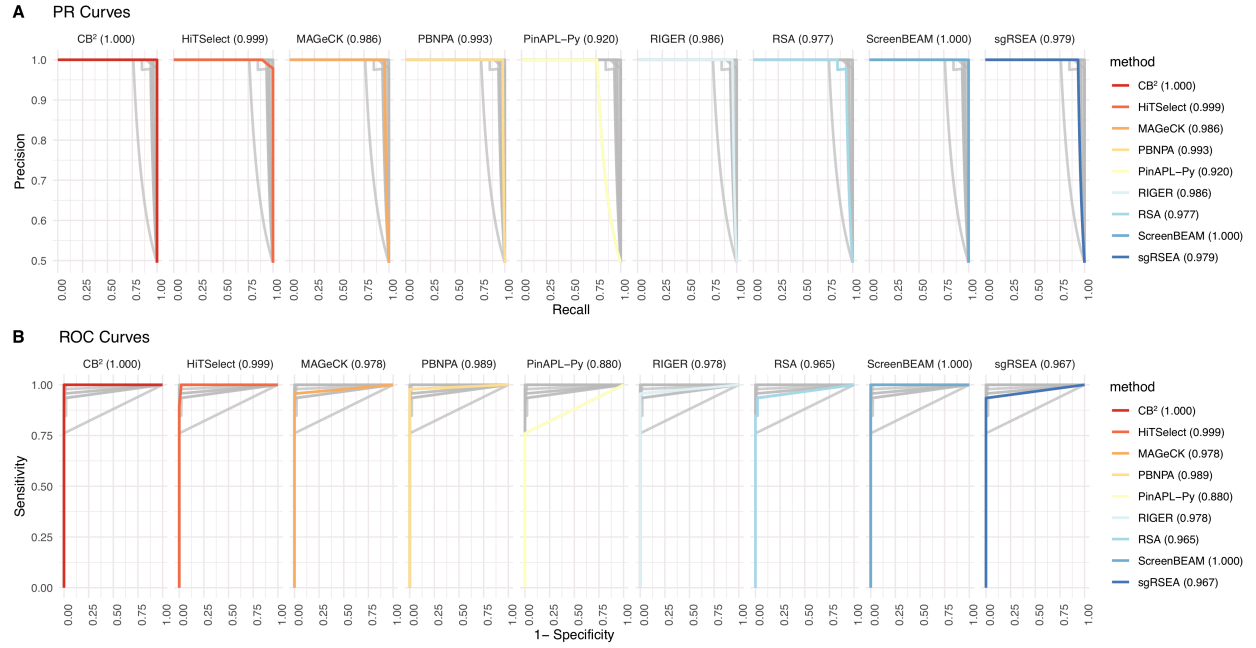

Supplemental Figure 4. Precision-Recall (PR) curve and Receiver operating characteristic (ROC) curve comparison of different methods using CRISPRn-RT112 dataset from (Evers et al. 2016). (A) PR curves for each method. A bracket-surrounded number right to a name of the method indicates area under the curve (AUC) of the corresponded PR curve of the method. (B) ROC curves for each method. A bracket-surrounded number right to a name of the method indicates AUC of the corresponded PR curve of the method.
