# Supplementary material for: Beta-binomial modeling of CRISPR pooled screen data identifies target genes with greater sensitivity and fewer false negatives
Source: HighWire-hosted journal article supplement (doi:10.1101/gr.245571.118), 2019-04-23
Supplement: Supplemental_Figure_S7.pdf [file Supplemental_Figure_S7.pdf]

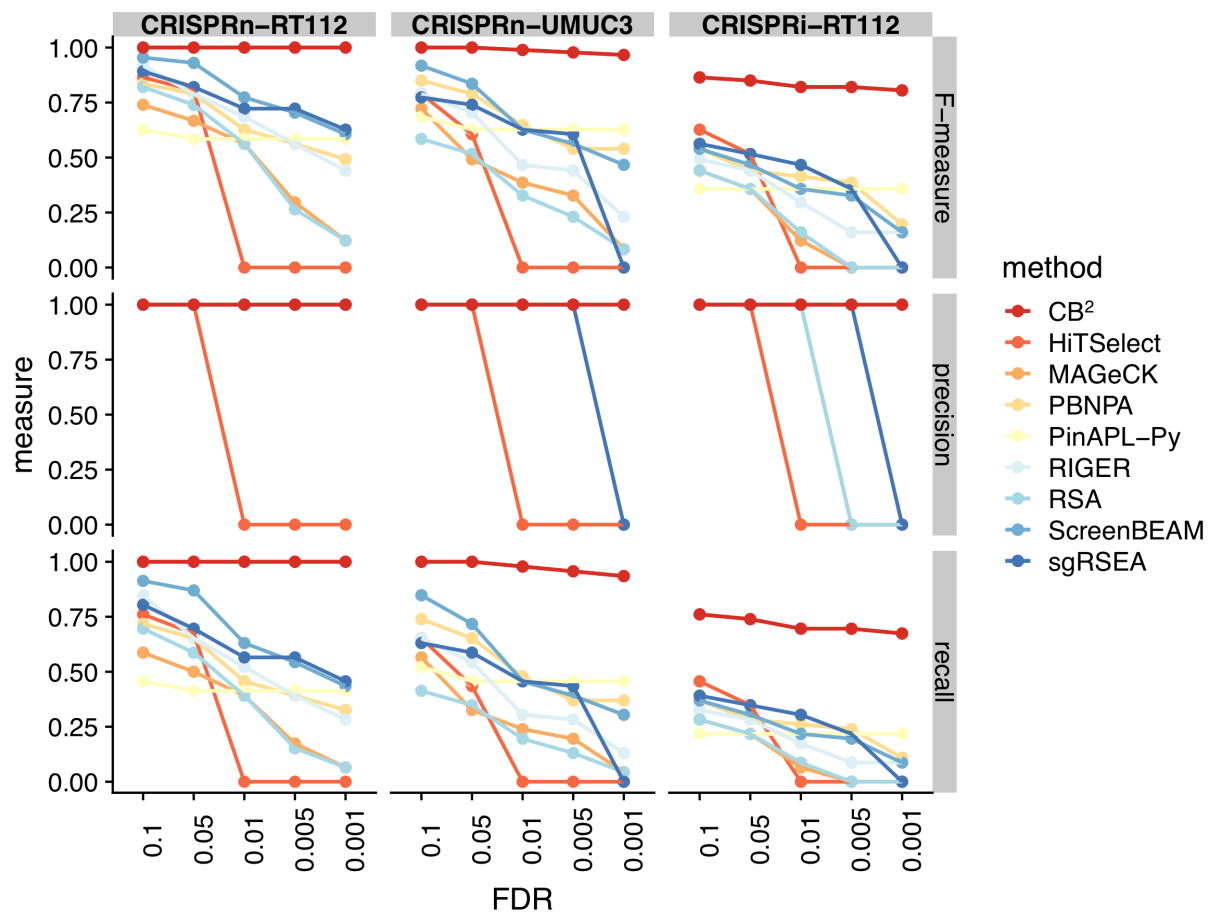

Supplemental Figure 7. CB<sup>2</sup> outperformed all other methods in F1, precision and recall measures on Evers et al. (2016)'s screen data. F1-score (top), precision (middle) and recall (bottom) for each method on three benchmark datasets are presented as a function of FDR cut-off values.
