# Supplementary material for: Beta-binomial modeling of CRISPR pooled screen data identifies target genes with greater sensitivity and fewer false negatives
Source: HighWire-hosted journal article supplement (doi:10.1101/gr.245571.118), 2019-04-23
Supplement: Supplemental_Figure_S11.pdf [file Supplemental_Figure_S11.pdf]

# Genome-wide CRISPRi library(Dolcetto Set A)

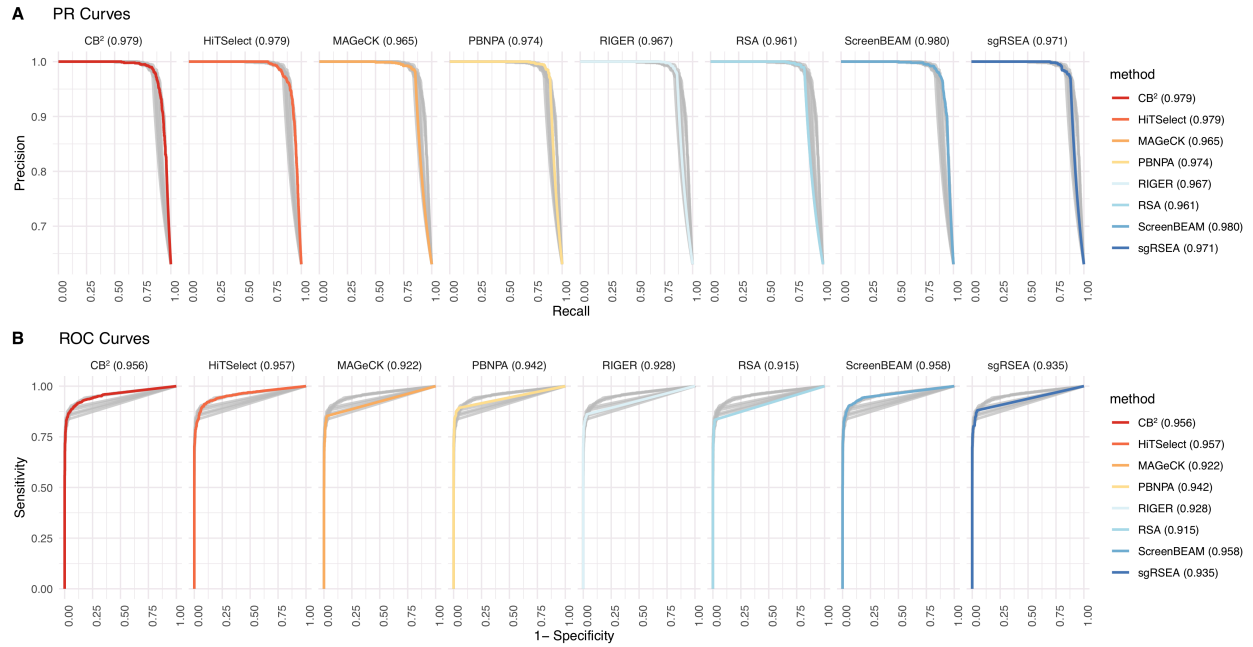

Supplemental Figure 11. PR curve and ROC curve comparison of different methods using CRISPRi-A375 dataset from Sanson et al. (2018). (A) PR curves for each method. A bracket-surrounded number right to a name of the method indicates AUC of the corresponded PR curve of the method. (B) ROC curves for each method. A bracket-surrounded number right to a name of the method indicates AUC of the corresponded PR curve of the method.
