# Supplementary material for: Beta-binomial modeling of CRISPR pooled screen data identifies target genes with greater sensitivity and fewer false negatives
Source: HighWire-hosted journal article supplement (doi:10.1101/gr.245571.118), 2019-04-23
Supplement: Supplemental_Figure_S12.pdf [file Supplemental_Figure_S12.pdf]

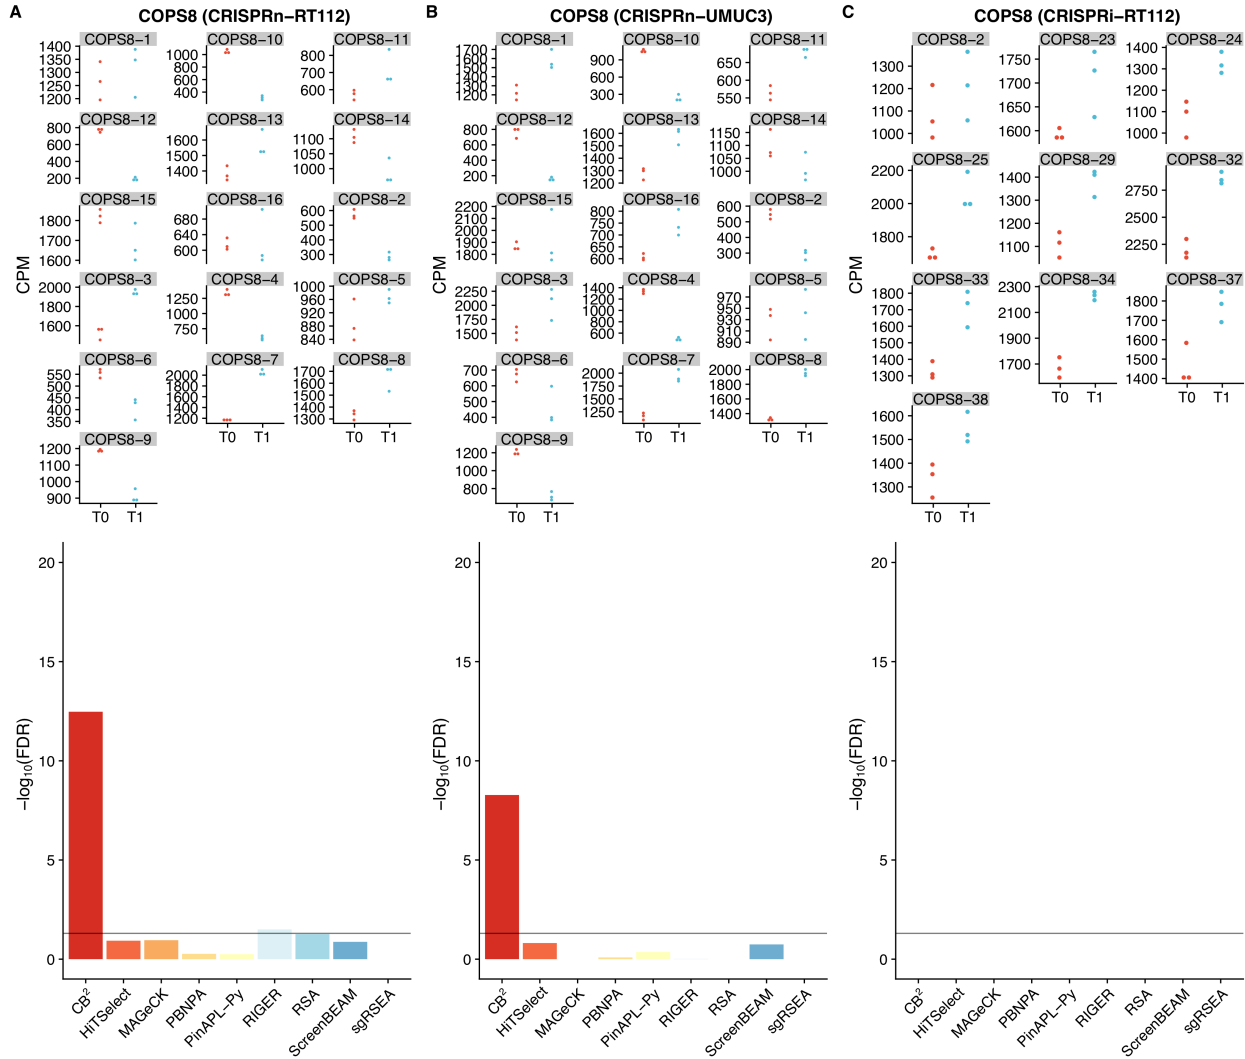

Supplemental Figure 12. CB<sup>2</sup> detects essential genes missed by other leading methods: the case of *COPS8*. sgRNA quantification for *COPS8* in cell line (A) RT112, (B) UMUC3 using CRISPRn and (C) RT112 using the CRISPRi library. The top panels show CPM (count per million) of sgRNAs that target *COPS8* for each group (T<sub>0</sub> and T<sub>1</sub>), and the bottom panels indicate the reported FDR for *COPS8* in each screen across all the methods. A horizontal line at FDR = 0.01 is used as a threshold for statistical cutoff. CB<sup>2</sup> outperforms all other methods of identifying *COPS8* as an essential gene across all benchmark datasets.
