# Supplementary material for: Beta-binomial modeling of CRISPR pooled screen data identifies target genes with greater sensitivity and fewer false negatives
Source: HighWire-hosted journal article supplement (doi:10.1101/gr.245571.118), 2019-04-23
Supplement: Supplemental_Figure_S14.pdf [file Supplemental_Figure_S14.pdf]

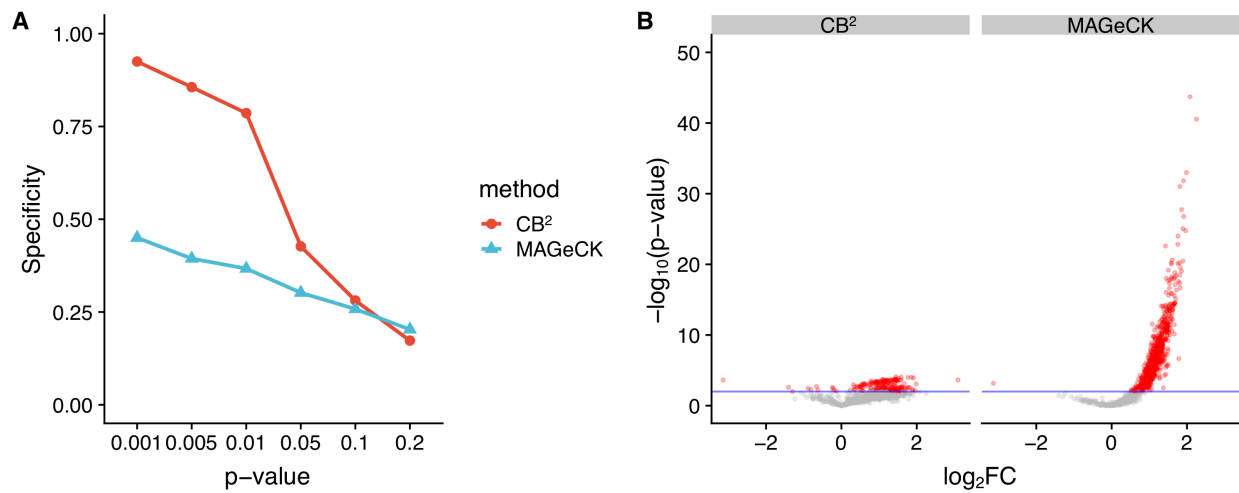

Supplemental Figure 14. Comparison of False Positive Rate for non-targeting sgRNAs on Sanson et al. (2018)'s CRISPRn-A375 screen data. (A) Specificity comparison between CB<sup>2</sup> and MAGeCK for the six different p-value thresholds. The y-axis indicates specificity, and the x-axis indicates the level of the p-value threshold for the specificity calculation. (B) Volcano plots of the p-value of non-targeting sgRNAs. The y-axis indicates the negative logarithm value of p-value, and the x-axis indicates the log<sub>2</sub> value of fold-change. All of the data points are from negative control sgRNAs. False Positive were plotted in red. Horizontal blue lines at  $p = 0.01$  indicate the threshold for statistical cutoff.
