# Supplementary material for: Beta-binomial modeling of CRISPR pooled screen data identifies target genes with greater sensitivity and fewer false negatives
Source: HighWire-hosted journal article supplement (doi:10.1101/gr.245571.118), 2019-04-23
Supplement: Supplemental_Figure_S15.pdf [file Supplemental_Figure_S15.pdf]

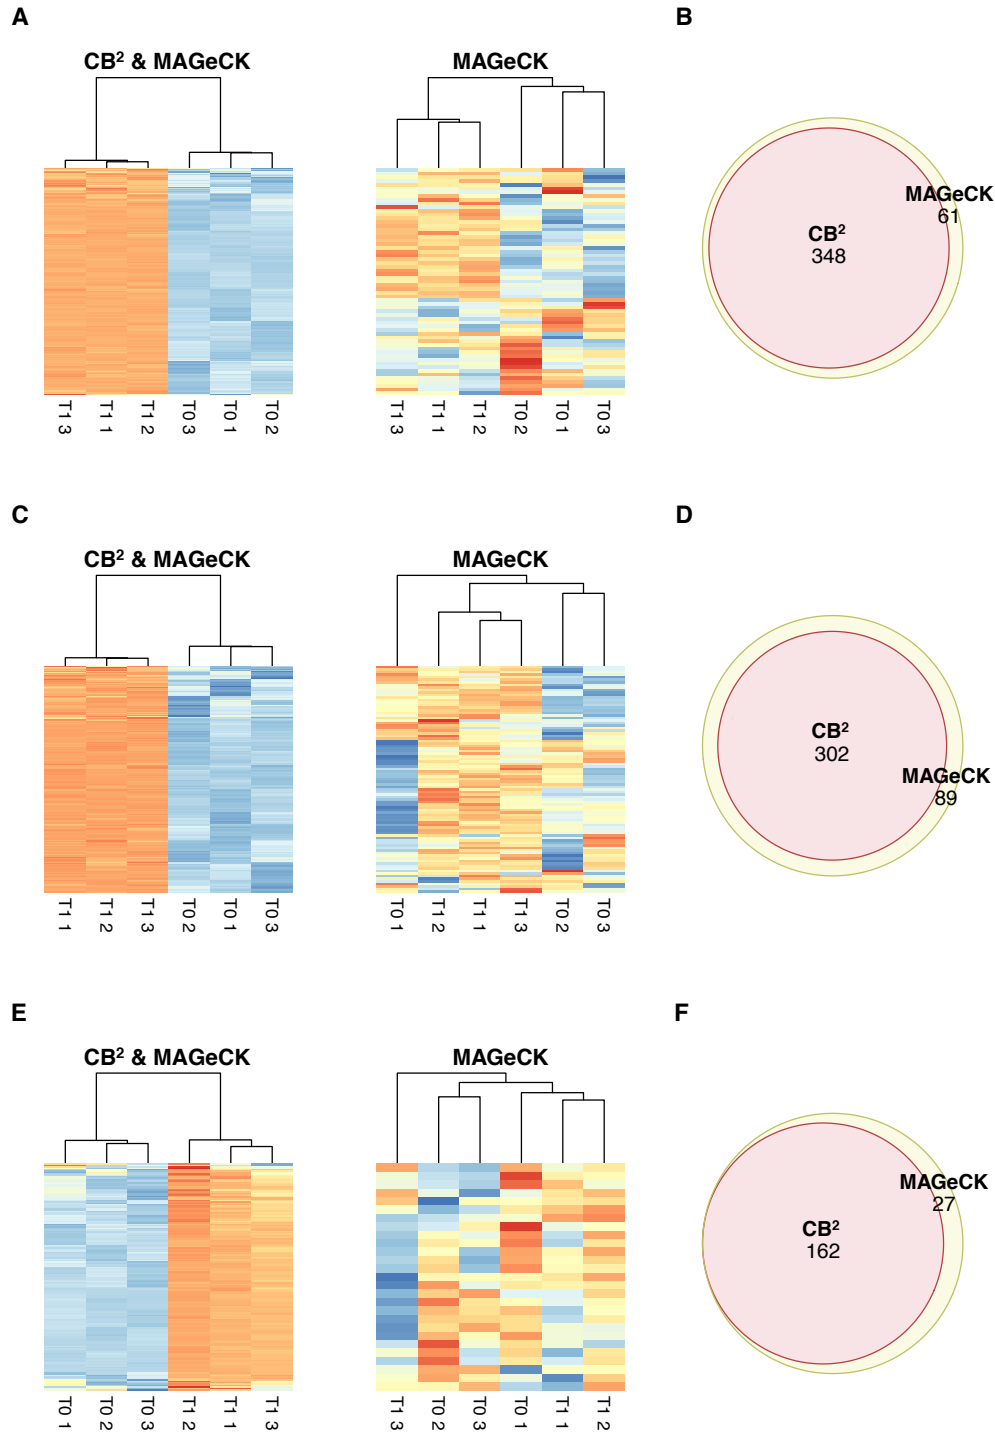

Supplemental Figure 15. Discrepancy of sgRNA level statistics between CB<sup>2</sup> and MAGeCK in two public CRISPR pooled screening. (A) Venn diagrams of sgRNAs detected by CB<sup>2</sup> and MAGeCK from CRISPRn-RT112 screen data. (B) A heatmap of normalized read counts of the detected sgRNAs from the screening data in CRISPRn-RT112 screen data. Left: A heatmap of sgRNAs detected by both CB<sup>2</sup> and MAGeCK. Right: A heatmap of sgRNAs detected by MAGeCK only. (C-D) Same representation as in (A-B), using CRISPRn-UMUC3 screen data. (E-F) Same representation as in (A-B), using CRISPRi-RT112 screen data.
