# Supplementary material for: Beta-binomial modeling of CRISPR pooled screen data identifies target genes with greater sensitivity and fewer false negatives
Source: HighWire-hosted journal article supplement (doi:10.1101/gr.245571.118), 2019-04-23
Supplement: Supplemental_Figure_S16.pdf [file Supplemental_Figure_S16.pdf]

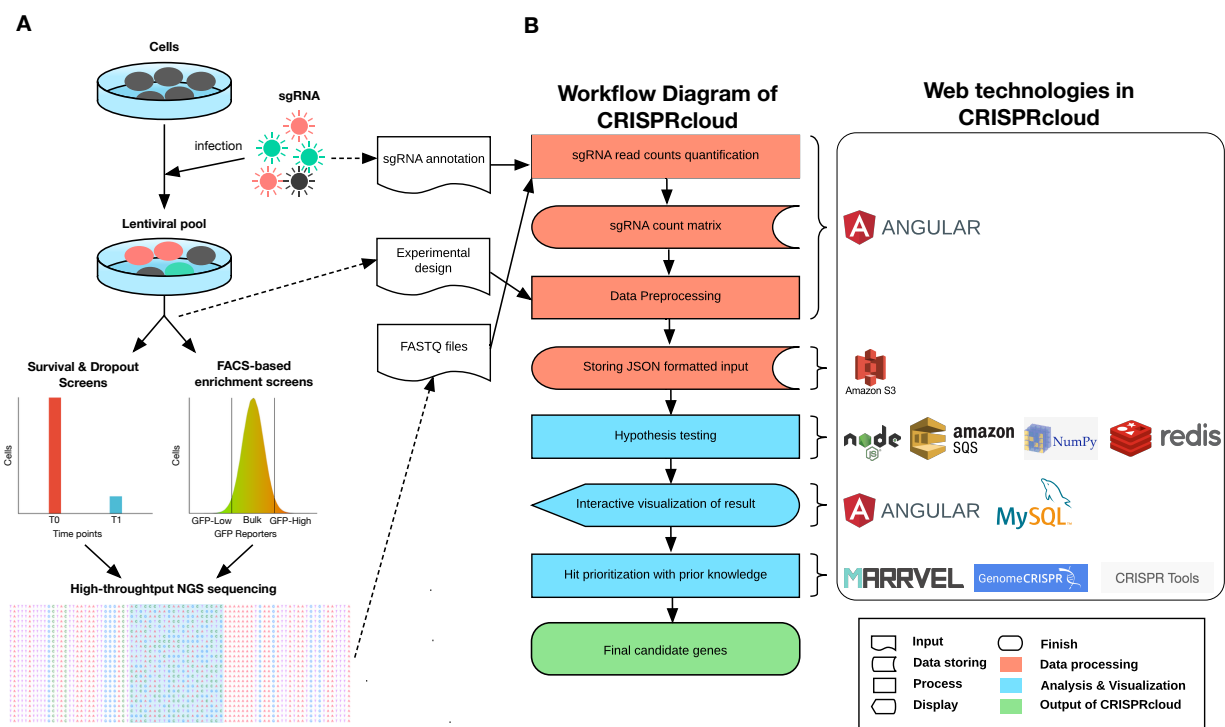

Supplemental Figure 16. Schematic of CRISPR/Cas9 pooled screening experiment, workflow diagram, and configuration for CRISPRcloud. (A) The workflow of CRISPR/Cas9 pooled screening experiment. Each dotted arrow line links between an experimental step to an input of CRISPRcloud. (B) The workflow of CRISPRcloud. This entire workflow runs on Amazon web services (AWS), and various web-based technologies were used to build this web-based cloud computing platform.
