# Supplementary material for: Beta-binomial modeling of CRISPR pooled screen data identifies target genes with greater sensitivity and fewer false negatives
Source: HighWire-hosted journal article supplement (doi:10.1101/gr.245571.118), 2019-04-23
Supplement: Supplemental_Figure_S17.pdf [file Supplemental_Figure_S17.pdf]

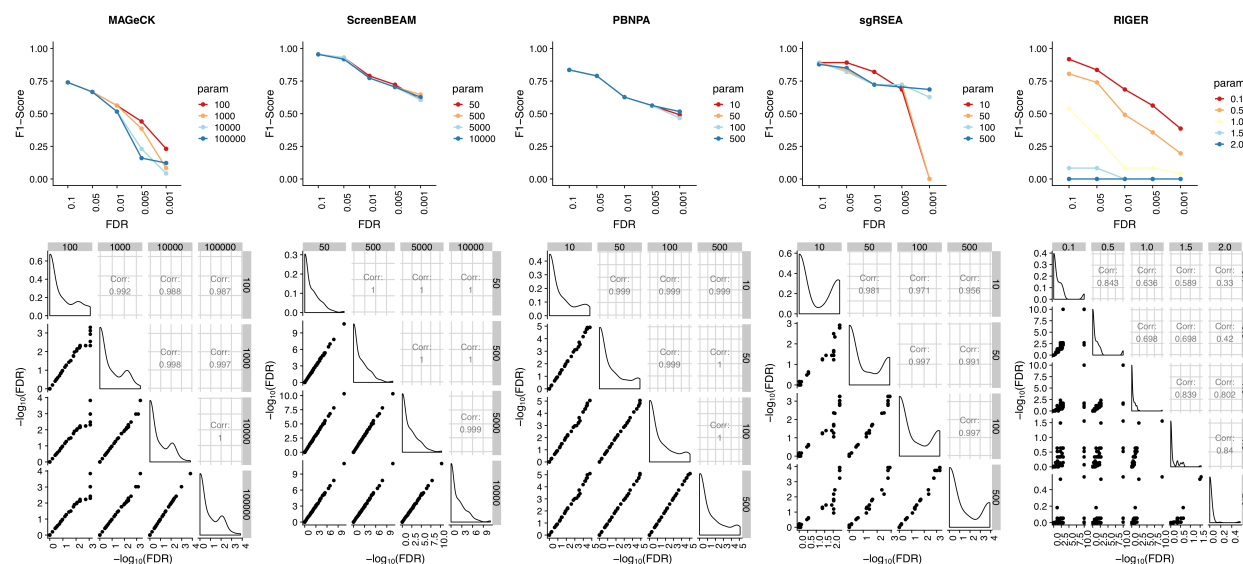

Supplemental Figure 17. Performance comparison with different tuning parameters of each method on CRISPRn-RT112 dataset. (A) F1-score for each method. Each F1-score plot of a method shows an F1-score at different FDR cut-off of multiple parameters. A color of a line indicates a different parameter setting, and legend title shows the parameter were tested. (B) Each plot reports pair-wise correlations of estimated FDR from different parameters. Each row and each column correspond a parameter and left-lower cells present scatter plots of two different estimated FDR sets from two corresponded different parameters. The diagonal cells show the distribution of the FDRs for a parameter. The right-upper cells present  $R^2$  (Pearson correlation coefficient) of two different estimated FDR sets from two corresponded different parameters.
