# Supplementary material for: Beta-binomial modeling of CRISPR pooled screen data identifies target genes with greater sensitivity and fewer false negatives
Source: HighWire-hosted journal article supplement (doi:10.1101/gr.245571.118), 2019-04-23
Supplement: Supplemental_Table_S2.pdf [file Supplemental_Table_S2.pdf]

Supplemental Table 2. Feature table of CB<sup>2</sup> as compared with existing CRISPR pooled screening pipeline.

| Features                                          | CRISPRcloud | MAGeCK-VISPR | PinAPL-Py |
|---------------------------------------------------|-------------|--------------|-----------|
| Web interface                                     | ✓           |              | ✓         |
| Cloud service                                     | ✓           |              |           |
| Parameter-free sgRNA mapping                      | ✓           | ✓            |           |
| Installation free                                 | ✓           |              | ✓         |
| Web-based FASTQ file processing                   | ✓           |              | ✓         |
| Automatic reverse complement FASTQ file detection | ✓           | ✓            |           |
| Gene-level statistics                             | ✓           | ✓            | ✓         |
| sgRNA-level statistics                            | ✓           | ✓            | ✓         |
| Multiple group studies                            | ✓           | ✓            | ✓         |
| Quality control                                   | ✓           | ✓            | ✓         |
